# Supplementary material
Source: MDPI journal article supplement (https://www.mdpi.com/2071-1050/14/7/4129)
Supplement: s1 [file s1]

## Supplementary Material

Results from ongoing air quality monitoring in the pilot case study school are shown below in Table S1. They show monthly nitrogen dioxide concentrations inside the school in the green fence area and an unvegetated area, and outside on the adjacent street. A site plan illustrates the AQ sampling locations in Figure S1.

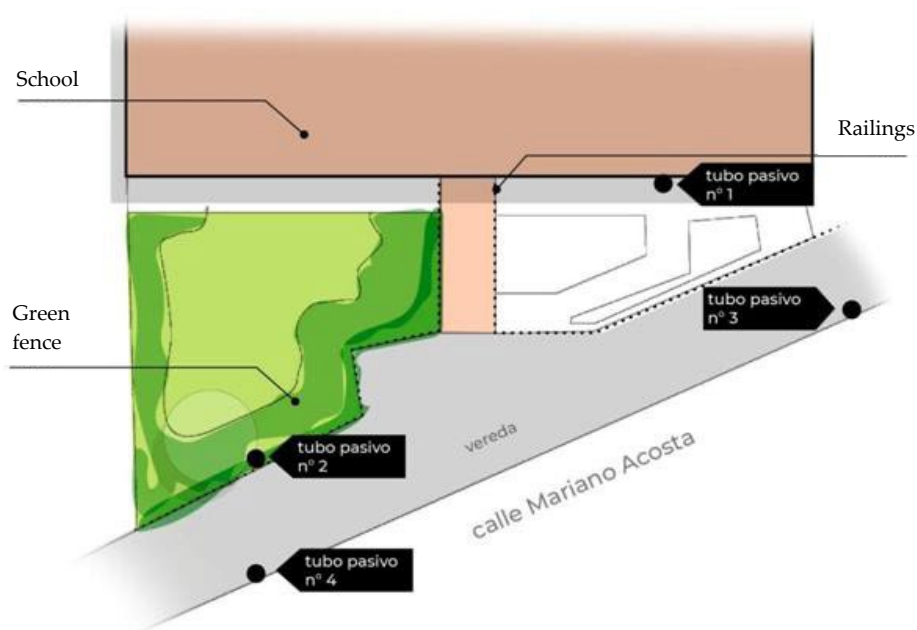

**Figure S1.** Location of NO<sub>2</sub> monitoring devices (diffusion tubes) in relation to the case study school and green fence.

**Table S1.** Results of monthly NO<sub>2</sub> concentration monitoring (diffusion tubes) in parts per billion (ppb).

| Monitoring campaign | Temp (°C) | Tube location | Average NO <sub>2</sub> concentrations (ppb) |
|---------------------|-----------|---------------|----------------------------------------------|
| 1                   | 17.9      | N°1           | 21                                           |
|                     |           | N°2           | 22                                           |
|                     |           | N°3           | 23                                           |
|                     |           | N°4           | 26                                           |
| 2                   | 11.4      | N°1           | 21                                           |
|                     |           | N°2           | 22                                           |
|                     |           | N°3           | 33                                           |
|                     |           | N°4           | 24                                           |
| 3                   | 9.2       | N°1           | 23                                           |
|                     |           | N°2           | 24                                           |
|                     |           | N°3           | 24                                           |
|                     |           | N°4           | 25                                           |
